# Supplementary material
Source: publisher figshare collection journal article supplement (https://tandf.figshare.com/articles/dataset/_/8286254)
Supplement: Supplementary file 1 [file 1]

# Activity of hydrothermal fluid at the bottom of a lake and its influence on the development of high-quality source rocks: Triassic Yanchang Formation, southern Ordos Basin, China

J. You<sup>a,b</sup>, Y. Liu<sup>a</sup>, D. Zhou<sup>c</sup>, Q. Zheng<sup>b</sup>, K. Vasichenko<sup>d</sup> and Z. Chen<sup>e</sup>

<sup>a</sup>State Key Laboratory of Continental Dynamics, Department of Geology, Northwest University, Xi'an 710069, China; <sup>b</sup>School of Energy Engineering, Yulin University, Yulin 719000, China; <sup>c</sup>College of Earth Science and Engineering, Shandong University of Science and Technology, Qingdao 266510, China; <sup>d</sup>College of Economics and Management, Northwest A&F University, Yangling 712100, China; <sup>e</sup>School of Earth Sciences and Engineering, Xi'an Petroleum University, Xi'an 710065, China

First author: You Jiyuan Email: [2373375337@qq.com](mailto:2373375337@qq.com)

Corresponding author: Liu Yiqun [liu-yiqun@263.com](mailto:liu-yiqun@263.com)

## SUPPLEMENTARY PAPERS

*Australian Journal of Earth Sciences* (2019) 66, [doi:10.1080/08120099.2019.1612783](https://doi.org/10.1080/08120099.2019.1612783)

---

Copies of Supplementary Papers may be obtained from the Geological Society of Australia's website ([www.gsa.org.au](http://www.gsa.org.au)), the Australian Journal of Earth Sciences website ([www.ajes.com.au](http://www.ajes.com.au)) or from the National Library of Australia's Pandora archive (<https://pandora.nla.gov.au/tep/150555>).

---

## Supplementary paper

Table S1: Major element and rare earth element concentrations from the Bawangzhuang profile, Z233 well, and H269 well. Fe<sub>2</sub>O<sub>3</sub> = total iron. (excel file)
