# Supplementary material
Source: publisher figshare collection journal article supplement (https://tandf.figshare.com/articles/dataset/_/8286254)
Supplement: Supplementary file 2 [file 1]

Archive with 2 entries (2 files):
- taje_a_1612783_sm4198.xlsx
- taje_a_1612783_sm4197.pdf
