# Supplementary material
Source: publisher figshare collection journal article supplement (https://tandf.figshare.com/articles/dataset/_/8286254)
Supplement: Supplementary file 2 [file 1 › taje_a_1612783_sm4198.xlsx]

## Sheet: geochemistry
You et al. (2019) Supplementary paper. Australian Journal of Earth Sciences, 66, doi:10.1080/08120099.2019.1612783
Table S1: Major element and rare earth element concentrations from the Bawangzhuang profile, Z233 well, and H269 well. Fe2O3 = total iron.
Sample	Depth	TOC	SiO2	TiO2	Al2O3	Fe2O3	MnO	MgO	CaO	Na2O	K2O	P2O5	LOI	Total	La	Ce	Pr	Nd	Sm	Eu	Gd	Tb	Dy	Ho	Er	Tm	Yb	Lu	∑REE	LREE/HREE	w(La)/w(Yb)
No.	(m)	(wt%)	(wt%)	(wt%)	(wt%)	(wt%)	(wt%)	(wt%)	(wt%)	(wt%)	(wt%)	(wt%)	(wt%)	(wt%)	ppm	ppm	ppm	ppm	ppm	ppm	ppm	ppm	ppm	ppm	ppm	ppm	ppm	ppm	ppm
Bawangzhuang profile
R-01	20.6	1.21	52.44	0.56	26.34	2.2	0.02	1.84	1.15	1.02	4.53	0.09	9.31	99.52	35.3	69.1	7.89	29.1	5.51	1.36	5.37	1.02	8.67	2.48	9.53	1.83	14.7	2.29	194.15	3.23077	2.40136
R-02	20.4	5.49	51.83	0.51	26.38	2.23	0.02	1.81	1.08	1.07	4.49	0.09	8.89	99.67	36.1	71.9	7.54	29.08	5.47	1.08	4.42	1.08	7.96	1.92	8.94	1.52	9.82	2.38	192.33	3.23257	2.39652
R-03	19.7	6.88	72.5	0.07	14.9	1.73	＜0.01	1.37	0.22	1.26	2.52	0.02	5	99.59	30.9	67.6	7.59	26.3	5.53	0.29	4.47	0.68	3.98	0.76	2.14	0.34	2.8	0.44	153.82	8.85394	11.0357
R-04	19.3	9.21	54.29	0.49	24.37	1.85	0.01	1.79	1.12	1.02	4.51	0.07	9.28	99.82	32.9	74.1	7.19	27.48	5.82	1.11	4.39	1.15	8.12	2.15	6.34	1.49	9.28	1.79	189.61	3.49625	2.01253
R-05	17.8	11.09	52.76	0.55	26.28	2.18	0.01	1.85	1.09	0.09	4.55	0.08	9.37	99.49	30.2	72.5	8.34	26.29	5.13	1.27	5.14	0.89	8.31	2.87	8.57	1.02	8.21	2.05	198.16	3.35201	2.78022
R-06	16.9	8.32	53.52	0.51	26.83	2.47	0.02	2.07	0.37	1.06	4.34	0.14	8.2	99.53	116	218	23.8	80.8	12.9	2.38	10.2	1.26	7.46	1.69	5.92	1.09	8.95	1.42	491.87	11.9474	12.9609
R-07	16.2	10.94	51.35	0.28	25.84	5.01	0.02	1.83	1.31	0.32	4.32	0.18	9.95	100.41	14.6	32.9	4	15.9	3.36	0.88	3.24	0.52	3.43	0.86	2.89	0.49	3.78	0.58	87.43	4.53705	3.86243
R-08	15.1	7.45	55.25	0.53	23.59	3.33	0.02	1.57	2.84	3.1	3.45	0.14	6.55	99.52	24.6	47.6	5.32	19.7	3.9	0.88	3.41	0.52	3.3	0.81	2.73	0.47	3.65	0.57	117.46	6.59767	6.73973
R-09	14.1	8.18	59.81	0.29	20.97	3.48	0.03	1.77	1.02	0.72	4	0.08	7.35	99.61	57.6	120	12.5	45	8.17	0.66	6.43	1.03	6.03	1.23	3.25	0.47	2.92	0.4	265.69	11.21	19.726
R-10	11.6	11.87	56.12	0.17	26.24	2.69	0.01	1.46	0.76	1.15	3.97	0.05	6.99	99.83	26.6	57.4	6.52	25.5	5.77	1.02	4.72	0.74	4.07	0.77	1.88	0.27	1.6	0.22	137.08	8.60617	16.625
R-11	10.2	14.65	61.93	0.29	21.79	2.46	0.01	1.61	0.55	1.65	3.82	0.14	5.58	99.55	66.5	120	10.9	35.9	5.49	0.88	4.38	0.63	3.72	0.82	2.44	0.4	2.78	0.45	255.29	15.3438	23.9209
R-12	9.7	13.21	54.89	0.26	25.58	3.02	＜0.01	1.49	0.66	1.29	4.34	0.1	7.92	99.26	64.7	136	14.9	55.8	11.1	1.53	9.25	1.46	8.45	16.9	4.43	0.65	4.07	0.57	329.81	6.20424	15.8968
R-13	8.8	13.85	58.21	0.59	20.44	3.56	＜0.03	2.05	1.64	1.38	4.27	0.15	6.94	99.19	48.5	94	10.1	36.8	7.04	1.24	5.87	0.93	5.64	1.21	3.47	0.54	3.65	0.56	219.55	9.03887	13.2877
R-14	7.2	9.25	65.94	0.08	19.95	1.76	0	1.65	0.17	0.49	4.23	0.02	4.9	99.57	32.3	71	7.64	28	6.04	0.28	5.22	0.93	5.75	1.17	3.36	0.56	4.17	0.65	167.07	6.66025	7.7458
R-15	6.3	10.32	51.86	0.8	30.06	1.51	0.01	1.35	0.7	1	5.35	0.13	6.8	99.56	49.2	82.1	7.33	24.6	4.35	0.5	3.43	0.57	3.68	0.84	2.63	0.43	2.9	0.43	182.99	11.273	16.9655
R-16	5.5	8.66	54.5	0.18	28.92	1.7	＜0.01	1.44	0.19	0.9	4.44	0.04	7.25	100.2	17.6	43.5	5.03	19.9	4.9	0.84	3.13	0.4	1.89	0.34	0.91	0.13	0.77	0.11	99.45	11.9492	22.8571
R-17	4.9	9.34	54.11	0.27	27.79	2.5	0.01	2.04	0.39	0.66	5.61	0.07	6.75	99.52	36.1	77.6	8.54	32.2	6.58	0.92	4.92	0.73	4.08	0.82	2.24	0.33	2.09	0.31	177.46	10.4343	17.2727
R-18	4.1	9.86	53.5	0.48	25.77	3.95	0.02	1.77	0.48	0.89	3.35	0.19	9.12	99.92	80.2	174	18.6	68.2	14.5	0.8	11.8	1.83	10.2	1.95	4.85	0.64	3.7	0.48	391.75	10.0508	21.6757
R-19	3.6	27.86	55.29	0.17	28.07	1.71	＜0.01	1.12	0.41	1.06	3.4	0.07	8.62	99.29	52.5	107	10.5	35.9	6.22	0.85	4.44	0.65	3.77	0.77	2.15	0.32	2.07	0.31	227.45	14.7079	25.3623
R-20	2.2	11.08	53.01	0.78	24.14	3.72	0.05	1.72	2.93	2.46	3.34	0.16	6.98	99.55	22.5	43.7	4.48	15.6	3.04	0.31	2.55	0.42	2.57	0.56	1.65	0.27	1.88	0.29	99.82	8.79588	11.9681
R-21	1.8	9.62	79.82	0.09	9.85	1.61	0.02	0.24	0.37	0.29	4.28	0.03	3.95	99.4	27.3	51.8	5.45	19.7	4.26	0.47	4.32	0.79	5.1	1.11	3.15	0.48	3.22	0.48	127.63	5.84343	8.47826
R-22	1.1	11.09	63.54	0.12	10.71	1.49	0.13	0.48	8.18	0.45	3.98	0.08	10.24	99.52	49.3	98.4	10.1	35.4	7.12	0.74	6.23	1.09	7	1.58	4.73	0.77	5.27	0.78	228.51	7.32459	9.35484
R-23	0.1	10.27	60.71	0.23	22.44	1.71	0.01	1	1.26	1.5	4.49	0.11	6.03	99.53	25.3	59.7	6.72	23.6	5.15	0.23	4.19	0.68	3.76	0.66	1.54	0.22	1.5	0.22	133.47	9.45184	16.8667
Average		10.4217	57.7035	0.36087	23.3587	2.51609	0.0233333	1.53565	1.25609	1.07957	4.15565	0.0969565	7.47696	99.6109	42.4696	86.5174	9.17304	32.9022	6.40652	0.892174	5.28348	0.869565	5.51913	1.92478	3.90174	0.640435	4.51217	0.773043	202.95	8.35399	12.704
Z233 well
Z-1	2269.5	1.23	68.43	0.08	17.15	2.59	0.01	1.4	0.36	0.37	3.28	0.02	5.85	99.52	78.1	166	15.5	59.5	9.9	0.7	7	1.1	6.4	1.4	3.7	0.6	3	0.5	353.4	13.9114	26.0333
Z-2	2269.1	7.58	69.22	0.43	18	3.06	0.01	1.42	0.37	1.12	2.34	0.17	3.14	99.28	51	112	18.6	45.3	9.2	0.5	7.5	1.2	6.9	1.5	3.4	0.5	2.6	0.4	260.6	9.85833	19.6154
Z-3	2268.5	10.08	72.45	0.1	17.44	0.77	0.01	0.9	0.27	1.72	1.43	0.05	4.16	99.3	78.6	190	25.6	69.5	13.5	0.8	11.2	1.7	9.7	2	4.7	0.7	4	0.7	412.7	10.8934	19.65
Z-4	2265.3	11.82	60.47	0.16	24.32	1.75	0.01	1.61	0.47	1.48	2.95	0.08	6.31	99.61	72.7	152	19.4	64	12.8	0.7	10.6	1.7	10.1	2.1	5.2	0.8	4.4	0.7	357.2	9.03371	16.5227
Z-5	2265.1	15.11	69.48	0.13	19.03	1.15	0.01	1.09	0.24	1.13	1.59	0.1	6.01	99.96	62.1	133	23.2	40.1	6.4	0.6	4.6	0.8	4.6	1.1	3.2	0.5	3	0.5	283.7	14.5027	20.7
Z-6	2264.9	10.18	64.22	0.3	22.71	0.77	0.01	0.96	1.01	1.49	1.79	0.43	5.22	99.41	55	135	6.7	43.2	6.9	0.9	4.2	0.6	3.1	0.6	1.8	0.3	1.6	0.3	260.2	19.816	34.375
Z-7	2260	13.87	53.9	0.38	30.17	1.47	0.01	1.01	0.56	1.43	2.58	0.23	9.02	99.75	35.3	87.6	12.2	34.8	7.4	1.2	4	0.4	1.5	0.3	0.7	0.1	0.6	0.1	186.2	23.1818	58.8333
Z-8	2257.9	11.93	58.71	0.22	26.41	1.18	0.01	1.37	0.2	1.29	3.07	0.08	7.11	99.65	59.4	111	13.5	34.1	4.9	1	3	0.5	2.6	0.6	1.6	0.3	1.5	0.3	234.3	21.5288	39.6
Z-9	2255.5	14.57	59.06	0.51	24.47	1.73	0.01	1.13	1.18	1.81	2.86	0.3	6.23	99.83	36.8	61.2	15.4	26.5	5	1	3.6	0.6	2.7	0.9	1.6	0.3	1.8	0.1	157.5	12.5776	20.4444
Z-10	2254.1	14.31	70.29	0.05	14.17	2.08	0.01	1.24	0.32	0.68	2.3	0.05	7.1	98.29	89.1	149	16.4	61.8	14.2	1.9	10.8	1.4	5.1	2.2	2.2	0.7	4.2	0.3	359.3	12.3569	21.2143
Z-11	2251.9	12.91	67.05	0.12	19.13	1.37	0.01	1.35	0.11	0.7	3.09	0.06	6.08	99.07	50.7	83.4	22.9	32.9	6.6	1.3	5.5	0.7	3.9	1.1	2.9	0.5	2.3	0.2	214.9	11.5673	22.0435
Z-12	2250	10.37	66.84	0.1	17.93	2.46	0.01	1.27	0.15	0.78	2.96	0.05	7.11	99.66	100.5	167	12.2	55.5	9.1	2.1	5.8	1.5	3.8	2.1	2.2	0.4	1.8	0.6	364.6	19.033	55.8333
Z-13	2248.7	12.56	52.76	0.7	28.02	1.44	0.01	1.47	0.32	1.66	1.02	0.21	12.3	99.91	49.8	99.3	12.5	23.9	4.8	1.7	4.1	0.6	4	0.8	2.7	0.6	3	0.6	208.4	11.7073	16.6
Z-14	2248.5	29.91	62.51	0.78	19.45	3.76	0.01	1.91	0.22	1.55	3.74	0.17	5.27	99.37	65.2	124	23.8	30.2	6.2	2.2	4.8	0.8	4.4	1.2	2.4	0.6	3.1	0.8	269.7	13.9006	21.0323
Z-15	2244	13.68	61.3	0.15	21.36	2.08	0.04	1.69	0.32	0.77	4.07	0.06	6.08	98.55	55.6	90.9	17.9	28.6	5.4	1.9	3.8	0.9	3.7	1.1	2.4	0.5	2.3	0.4	215.4	13.2649	24.1739
Z-16	2242.3	12.03	49.37	0.95	30.11	1.76	0.02	0.96	1.39	1.35	3.65	0.18	10.2	99.34	38.9	66.7	22.8	28.5	6.8	1.3	5.2	0.7	4.8	1	3.9	0.5	4.5	0.5	186.1	7.81991	8.64444
Average		12.6338	62.8787	0.3225	21.8669	1.83875	0.0125	1.29875	0.468125	1.20813	2.67	0.14	6.69937	99.4062	61.175	120.506	17.4125	42.4	8.06875	1.2375	5.98125	0.95	4.83125	1.25	2.7875	0.49375	2.73125	0.4375	270.263	14.0596	26.5822
H269 well
H-1	2580.4	0.51	61.25	0.1	17.66	2.24	0.09	2.04	1.15	0.52	2.75	0.05	11.8	99.65	39.6	91.2	18.6	33.9	7.2	0.91	4.9	0.6	4.9	0.9	2.9	0.4	4.2	0.6	156.2	9.54526	13.4545
H-2	2578.8	0.48	67.1	0.24	14.38	2.99	0.07	1.83	2.04	0.5	1.76	0.08	8.65	99.64	36.5	88.6	13.2	31.2	6.3	0.87	4.1	0.5	3.2	1.2	2.5	0.3	4.1	0.9	145.9	10.2236	11.1655
H-3	2578.3	0.98	74.31	0.09	12.75	1.2	0.01	0.88	1.67	0.97	1.98	0.02	5.86	99.74	38.1	87.6	14.5	29.6	6.3	0.32	5.2	0.6	4.5	1.3	3.1	0.3	4.3	0.5	132.9	13.6549	9.15641
H-4	2574.3	0.96	62.95	0.06	12.12	3.42	0.09	1.22	7.66	0.26	1.33	0.02	10.9	100.03	33.9	93.8	15.3	28.5	6.2	0.69	3.5	0.8	4.6	0.8	3.2	0.6	3.9	0.7	187.2	11.3265	10.4565
H-5	2573.2	1.01	74.54	0.09	12.96	0.78	<0.01	0.75	0.3	1.03	2.19	0.08	7.23	99.95	35.9	101.3	11.9	30.2	5.9	0.65	5.4	0.3	3.9	0.9	2.5	0.2	3.8	0.3	165.1	9.88789	15.5463
H-6	2568	1.11	49.66	0.72	21.74	3.62	0.07	3.18	5.44	1.78	1.28	0.28	11.83	99.6	41.3	96.3	19.8	25.9	6.9	1.3	3.1	0.2	5.1	1.1	2.7	0.5	4.6	0.6	145.8	9.32541	12.5646
H-7	2564.3	1.15	68.75	0.31	8.87	2.5	0.09	1.9	5.38	1.72	1.97	0.1	8.2	99.79	44.2	98.7	21.3	31.9	8.2	1.28	4.9	0.6	4.5	1.3	2.4	0.5	4.9	0.5	172.3	10.2359	9.45658
H-8	2559.9	2.12	71.2	0.1	10.58	1.93	0.07	0.62	1.94	0.57	2.51	0.03	10.31	99.86	39.9	96.3	10.9	30.2	9.1	0.99	3	0.5	3.8	1.1	3.2	0.3	2.9	0.6	185.6	14.5698	11.5897
H-9	2557.1	2.88	59.31	0.21	20.45	4.13	0.03	2.39	0.86	1.32	1.73	0.06	9.09	99.58	38.6	103.2	15.2	25.4	5.3	0.98	4.8	0.3	5.3	0.8	3.1	0.4	3.5	0.8	139.7	8.91235	16.4564
H-10	2555	2.35	71.78	0.07	14.58	1.1	0.01	0.86	0.4	0.71	1.39	0.04	8.61	99.55	41.2	99.8	18.7	27.8	6.9	1.32	3.8	0.8	4.7	0.9	2.6	0.6	3.9	0.7	145.7	8.45552	16.9786
H-11	2553.2	2.31	72.76	0.13	14.18	1.62	0.02	0.72	0.6	1.81	1.36	0.06	6.65	99.91	40.3	88.3	13.6	21.3	7.1	1.21	5.2	0.7	4.9	0.8	2.7	0.5	3.8	0.5	144.2	9.63983	12.4566
H-12	2553.1	5.71	66.24	0.11	15.52	1.59	0.04	1.4	1.33	0.8	1.65	0.05	11.18	99.91	49.6	87.6	14.5	33.3	7.3	0.87	4.7	0.3	5.1	1.2	3.5	0.4	4.2	0.4	163.1	10.3264	10.6513
H-13	2551.9	1.87	67.33	0.11	19.08	0.99	0.01	0.94	1.11	1	2.88	0.02	6.03	99.5	32.9	95.6	19.8	23.9	9.1	0.76	3.6	0.5	3.4	0.8	3.1	0.4	3.2	0.8	168.5	9.52641	15.1252
H-14	2551.1	2.01	77.91	0.07	13.45	0.7	<0.01	0.88	0.12	0.39	2.36	0.02	4.07	99.97	38.7	96.3	14.1	25.8	6.3	1.23	3.8	0.4	3.8	1.1	2.4	0.3	3.7	0.4	166.7	8.36529	14.8985
Average		1.81786	67.5064	0.172143	14.88	2.05786	0.05	1.40071	2.14286	0.955714	1.93857	0.065	8.60071	99.7629	39.3357	94.6143	15.8143	28.4929	7.00714	0.955714	4.28571	0.507143	4.40714	1.01429	2.85	0.407143	3.92857	0.592857	158.493	10.2854	12.854
